# Supplementary material
Source: PubMed Central journal article supplement (PMC4142809)
Supplement: NIHMS614263-supplement-01.pdf [file NIHMS614263-supplement-01.pdf]

Supplemental Table 1

## BOLD Responses for Look Harsh Faces versus Neutral Scenes in SAD

| Brain Regions                    | BA     | x y z       | Percent Change | Vol (mm <sup>3</sup> ) | t-value |
|----------------------------------|--------|-------------|----------------|------------------------|---------|
| <b><u>Harsh &gt; Neutral</u></b> |        |             |                |                        |         |
| <b><u>Frontal Lobes</u></b>      |        |             |                |                        |         |
| R Middle Frontal Gyrus           | 9, 10  | 41 49 29    | .17            | 1829                   | 4.41    |
| Medial PFC                       | 10     | 0 59 26     | .14            | 610                    | 3.63    |
| R Inferior Frontal Gyrus         | 9      | 34 14 25    | .07            | 244                    | 4.52    |
| <b><u>Occipital Lobes</u></b>    |        |             |                |                        |         |
| R Inferior Occipital Gyrus       | 18, 19 | 45 -82 -6   | .33            | 3820                   | 9.40    |
| L Inferior Occipital Gyrus       | 19     | -41 -75 -16 | .41            | 1341                   | 4.12    |
| R Middle Occipital Gyrus         | 18, 19 | 55 -72 1    | .23            | 203                    | 3.07    |
| <b><u>Parietal Lobes</u></b>     |        |             |                |                        |         |
| Posterior Cingulate Gyrus        | 23, 31 | 0 -20 29    | .12            | 650                    | 5.24    |
| Posterior Cingulate / Precuneus  | 31, 7  | 0 -57 28    | .17            | 488                    | 3.90    |
| R Inferior Parietal Lobule       | 40     | 41 -51 39   | .06            | 244                    | 3.46    |
| <b><u>Temporal Lobes</u></b>     |        |             |                |                        |         |
| L Fusiform Gyrus                 | 37     | -41 -48 -16 | .22            | 1148                   | 4.24    |
| R Middle Temporal Gyrus          | 37     | 48 -61 8    | .10            | 284                    | 4.58    |
| <b><u>Subcortical</u></b>        |        |             |                |                        |         |
| L Dorsal/extended Amygdala       |        | -17 -3 -9   | .13            | 163                    | 5.17    |
| R Dorsal/extended Amygdala       |        | 17 -9 -9    | .10            | 244                    | 4.50    |
| Culmen Cerebellum                |        | -3 -44 -6   | .05            | 528                    | 4.17    |
| <b><u>Neutral &gt; Harsh</u></b> |        |             |                |                        |         |
| <b><u>Occipital Lobes</u></b>    |        |             |                |                        |         |
| L Superior Occipital Gyrus       | 19     | -34 -89 29  | .28            | 1138                   | 4.22    |
| L Precuneus                      | 19     | -17 -86 43  | .27            | 1016                   | 2.22    |
| L Cuneus                         | 19     | -21 -86 29  | .07            | 406                    | 4.29    |
| L Cuneus                         | 7      | -21 -72 32  | .07            | 203                    | 4.22    |
| L Cuneus                         | 19     | -31 -92 32  | .26            | 163                    | 4.31    |
| <b><u>Parietal Lobes</u></b>     |        |             |                |                        |         |
| R Posterior Cingulate Gyrus      | 30     | 14 -55 15   | .15            | 325                    | 4.70    |
| R Posterior Cingulate Gyrus      | 31     | 7 -31 39    | .06            | 163                    | 4.86    |
| <b><u>Temporal Lobes</u></b>     |        |             |                |                        |         |
| L Parahippocampal Gyrus          | 36     | -24 -41 -9  | .33            | 6421                   | 4.85    |
| R Parahippocampal Gyrus          | 35     | 28 -24 -16  | .18            | 650                    | 4.42    |

Note. BA=Brodmann Area, PFC=prefrontal cortex, L=left, R=right

## Supplemental Table 2

## BOLD Responses for Look Harsh Faces versus Neutral Scenes in HC

| Brain Regions                    | BA     | x y z       | Percent Change | Vol (mm <sup>3</sup> ) | t-value |
|----------------------------------|--------|-------------|----------------|------------------------|---------|
| <b><u>Harsh &gt; Neutral</u></b> |        |             |                |                        |         |
| <b><u>Occipital Lobes</u></b>    |        |             |                |                        |         |
| R Middle Occipital Gyrus         | 19     | 45 -72 -9   | .48            | 2682                   | 5.03    |
| L Inferior Occipital Gyrus       | 18, 19 | -45 -82 -6  | .26            | 447                    | 6.39    |
| <b><u>Parietal Lobes</u></b>     |        |             |                |                        |         |
| Posterior Cingulate Cortex       | 23     | 0 -27 26    | .21            | 2235                   | 5.03    |
| R Inferior Parietal Lobule       | 40     | 48 -55 39   | .11            | 772                    | 5.29    |
| R Supramarginal Gyrus            | 40     | 58 -61 32   | .16            | 569                    | 5.34    |
| L Inferior Parietal Lobule       | 40     | -45 -41 53  | .07            | 163                    | 4.77    |
| <b><u>Subcortical</u></b>        |        |             |                |                        |         |
| Left Lentiform Nucleus/Putamen   |        | -14 4 8     | .04            | 203                    | 4.55    |
| L Dorsal/extended Amygdala       |        | -17 -4 -9   | .10            | 81                     | 4.77    |
| R Dorsal/extended Amygdala       |        | 18 -3 -9    | .14            | 122                    | 5.03    |
| <b><u>Neutral &gt; Harsh</u></b> |        |             |                |                        |         |
| <b><u>Occipital Lobes</u></b>    |        |             |                |                        |         |
| L Precuneus                      | 19     | -17 -82 46  | .31            | 19396                  | 4.80    |
| <b><u>Parietal Lobes</u></b>     |        |             |                |                        |         |
| R Superior Parietal Lobule       | 7      | 24 -65 50   | .10            | 284                    | 3.45    |
| <b><u>Temporal Lobes</u></b>     |        |             |                |                        |         |
| L Middle Temporal Gyrus          | 37     | -55 -51 -9  | .13            | 569                    | 4.06    |
| L Parahippocampal Gyrus          | 37     | -23 -39 -10 | .31            | 800                    | 8.01    |
| R Parahippocampal Gyrus          | 36     | 21 -44 -9   | .34            | 16336                  | 6.06    |

Note. BA=Brodmann Area, L=left, R=right

## Supplemental Table 3

## BOLD Responses for Look Violent versus Neutral Scenes in SAD

| Brain Regions                      | BA | x y z       | %<br>Signal<br>Change | Vol<br>(mm <sup>3</sup> ) | t-value |
|------------------------------------|----|-------------|-----------------------|---------------------------|---------|
| <b><u>Violent &gt; Neutral</u></b> |    |             |                       |                           |         |
| <b><u>Frontal Lobes</u></b>        |    |             |                       |                           |         |
| R Dorsolateral PFC                 | 9  | 38 11 29    | .20                   | 1219                      | 4.17    |
| Medial PFC                         | 9  | 0 52 29     | .12                   | 203                       | 4.20    |
| R Dorsolateral PFC                 | 9  | 41 25 26    | .10                   | 463                       | 4.21    |
| <b><u>Occipital Lobes</u></b>      |    |             |                       |                           |         |
| L Middle Occipital Gyrus           | 19 | -55 -75 -2  | .72                   | 17555                     | 4.23    |
| R Middle Occipital Gyrus           | 19 | 48 -72 -2   | .59                   | 14792                     | 5.24    |
| R Lingual Gyrus                    | 18 | 14 -79 -6   | .12                   | 691                       | 5.27    |
| R Cuneus                           | 19 | 24 -86 32   | .18                   | 244                       | 4.62    |
| L Cuneus                           | 19 | -28 -79 29  | .15                   | 203                       | 4.78    |
| L Lingual Gyrus                    | 18 | -17 -79 -12 | .14                   | 163                       | 4.37    |
| <b><u>Parietal Lobes</u></b>       |    |             |                       |                           |         |
| Posterior                          | 31 | 0 -54 29    | .21                   | 1504                      | 5.45    |
| Cingulate/Precuneus                |    |             |                       |                           |         |
| L Superior Parietal Lobule         | 7  | -34 -48 67  | .20                   | 163                       | 5.04    |
| <b><u>Temporal Lobes</u></b>       |    |             |                       |                           |         |
| L Fusiform Gyrus                   | 37 | -41 -41 -19 | .32                   | 610                       | 5.21    |
| R Fusiform Gyrus                   | 37 | 38 -44 -12  | .35                   | 366                       | 4.54    |
| R Middle Temporal Gyrus            | 21 | 52 -6 -12   | .09                   | 244                       | 5.43    |
| <b><u>Subcortical</u></b>          |    |             |                       |                           |         |
| L Dorsal/extended Amygdala         |    | -20 -4 -9   | .10                   | 163                       | 3.85    |
| R Thalamus                         |    | 14 -27 1    | .13                   | 447                       | 5.44    |
| L Thalamus                         |    | -17 -27 1   | .11                   | 244                       | 4.84    |
| <b><u>Neutral &gt; Violent</u></b> |    |             |                       |                           |         |
| <b><u>Frontal Lobes</u></b>        |    |             |                       |                           |         |
| R Insula                           | 13 | 41 -6 5     | .11                   | 447                       | 5.14    |
| R Insula                           | 13 | 34 -10 19   | .08                   | 325                       | 4.24    |
| R Insula                           | 13 | 41 -27 19   | .09                   | 284                       | 4.22    |
| R Insula                           | 13 | 34 1 12     | .07                   | 244                       | 4.50    |
| <b><u>Temporal Lobes</u></b>       |    |             |                       |                           |         |
| L Superior Temporal Gyrus          | 22 | -58 -10 12  | .16                   | 1666                      | 5.74    |
| L Superior Temporal Gyrus          | 42 | -65 -20 12  | .12                   | 244                       | 4.95    |
| L Parahippocampal Gyrus            | 37 | -28 -43 -8  | .08                   | 163                       | 3.71    |

**Note.** BA=Brodmann Area, L=left, PFC=prefrontal cortex, R=right

Supplemental Table 4

## BOLD Responses to Look Violent versus Neutral Scenes in HC

| Brain Regions                      | BA     | x y z       | % Signal Change | Vol (mm <sup>3</sup> ) | t-value |
|------------------------------------|--------|-------------|-----------------|------------------------|---------|
| <b><u>Violent &gt; Neutral</u></b> |        |             |                 |                        |         |
| <b><u>Frontal Lobes</u></b>        |        |             |                 |                        |         |
| Medial PFC                         | 9      | 3 52 22     | .13             | 244                    | 4.77    |
| Dorsomedial PFC                    | 8      | 3 25 43     | .14             | 163                    | 5.05    |
| Dorsomedial PFC                    | 6, 8   | 3 14 53     | .15             | 488                    | 4.71    |
| R Dorsolateral PFC                 | 9      | 45 18 29    | .19             | 3576                   | 7.51    |
| R Dorsolateral PFC                 | 9, 46  | 55 25 29    | .19             | 203                    | 5.41    |
| L Middle Frontal Gyrus             | 6      | -31 -3 46   | .08             | 203                    | 5.17    |
| R Anterior Insula                  | 13     | 31 25 1     | .09             | 569                    | 6.33    |
| L Anterior Insula                  | 13     | -31 28 5    | .11             | 447                    | 5.84    |
| <b><u>Occipital Lobes</u></b>      |        |             |                 |                        |         |
| R Middle Occipital Gyrus,          | 19     | 48 -72 -9   | .88             | 25,886                 | 5.13    |
| Fusiform Gyrus                     | 37     | 39 -48 -16  | .33             |                        |         |
| L Middle Occipital Gyrus,          | 19     | -45 -79 -6  | .61             | 23,163                 | 3.99    |
| Fusiform Gyrus                     | 37     | -40 -45 -11 | .26             |                        |         |
| L Lingual Gyrus                    | 18     | -14 -99 -2  | .19             | 163                    | 4.16    |
| R Cuneus                           | 19     | 28 -82 26   | .10             | 163                    | 5.19    |
| <b><u>Parietal Lobes</u></b>       |        |             |                 |                        |         |
| Posterior Cingulate Gyrus          | 23, 31 | 0 -48 22    | .21             | 731                    | 4.74    |
| Left Superior Parietal Lobule      | 7      | -28 -68 60  | .24             | 569                    | 4.64    |
| Left Superior Parietal Lobule      | 7      | -38 -44 63  | .23             | 2641                   | 4.76    |
| Precuneus                          |        |             |                 |                        |         |
| <b><u>Temporal Lobes</u></b>       |        |             |                 |                        |         |
| R Superior Temporal Gyrus          | 38     | 41 21 -19   | .13             | 284                    | 5.09    |
| R Middle Temporal Gyrus            | 21     | 52 4 -16    | .10             | 163                    | 5.37    |
| <b><u>Subcortical</u></b>          |        |             |                 |                        |         |
| Red Nucleus/Thalamus               |        | 0 -27 5     | .19             | 2804                   | 4.05    |
| R Thalamus                         |        | 14 -24 1    | .10             | 447                    | 4.23    |
| L Dorsal/extended Amygdala         |        | -20 -3 -9   | .09             | 122                    | 4.50    |
| R Dorsal/extended Amygdala         |        | 17 -1 -9    | .11             | 122                    | 4.37    |
| <b><u>Neutral &gt; Violent</u></b> |        |             |                 |                        |         |
| <b><u>Frontal Lobes</u></b>        |        |             |                 |                        |         |
| L Insula                           | 13     | -34 4 15    | .09             | 2032                   | 5.37    |
| L Posterior Insula                 | 13     | -38 -27 19  | .09             | 488                    | 4.65    |
| L Posterior Insula                 | 13     | -38 -17 12  | .10             | 244                    | 5.33    |
| Supplementary Motor Area           | 6      | -10 -17 60  | .04             | 203                    | 4.30    |
| L Posterior Insula                 | 13     | -41 -34 19  | .10             | 163                    | 5.25    |
| <b><u>Parietal Lobes</u></b>       |        |             |                 |                        |         |
| R Postcentral Gyrus                | 3      | 52 -10 43   | .11             | 325                    | 4.88    |
| <b><u>Temporal Lobes</u></b>       |        |             |                 |                        |         |

|                           |    |             |     |       |      |
|---------------------------|----|-------------|-----|-------|------|
| R Superior Temporal Gyrus | 22 | 58 11 1     | .36 | 15320 | 4.75 |
| L Superior Temporal Gyrus | 42 | -65 -13 12  | .20 | 4307  | 5.27 |
| L Hippocampus             |    | -31 -37 -2  | .06 | 284   | 4.24 |
| L Superior Temporal Gyrus | 22 | -45 -10 1   | .08 | 244   | 3.69 |
| L Inferior Temporal Gyrus | 20 | -58 -51 -12 | .13 | 203   | 3.84 |

Note. BA=Brodmann Area, L=left, PFC=prefrontal cortex, R=right

## Supplemental Table 5

## BOLD Responses for Regulate versus Look Harsh Faces in SAD

| Brain Regions                     | BA     | x y z      | Percent Change | Vol (mm <sup>3</sup> ) | t-value |
|-----------------------------------|--------|------------|----------------|------------------------|---------|
| <b><u>Regulate &gt; Look</u></b>  |        |            |                |                        |         |
| <b><u>Frontal Lobes</u></b>       |        |            |                |                        |         |
| L Inferior Frontal Gyrus          | 47     | -55 31 1   | .13            | 406                    | 4.94    |
| R Inferior Frontal Gyrus          | 45, 47 | 55 28 1    | .08            | 203                    | 5.77    |
| Dorsomedial PFC                   | 6      | 7 14 63    | .07            | 163                    | 3.82    |
| <b><u>Parietal Lobes</u></b>      |        |            |                |                        |         |
| L Supramarginal Gyrus             | 39     | -55 -58 36 | .13            | 2641                   | 5.11    |
| L Precuneus                       | 7      | -7 -65 39  | .07            | 650                    | 3.52    |
| R Supramarginal Gyrus             | 40     | 58 -51 26  | .09            | 569                    | 3.98    |
| L Inferior Parietal Lobule        | 40, 39 | -52 -61 46 | .09            | 284                    | 3.62    |
| <b><u>Temporal Lobes</u></b>      |        |            |                |                        |         |
| L Superior Temporal Gyrus         | 21     | -58 -31 1  | .07            | 1341                   | 3.83    |
| R Middle Temporal Gyrus           | 21, 22 | 52 -27 -2  | .10            | 488                    | 3.47    |
| R Superior Temporal Gyrus         | 22     | 62 -41 5   | .10            | 203                    | 4.11    |
| <b><u>Subcortical</u></b>         |        |            |                |                        |         |
| L Lentiform, Putamen              |        | -17 4 -6   | .08            | 528                    | 4.13    |
| <b><u>Look &gt; Regulate</u></b>  |        |            |                |                        |         |
| <b><u>Frontal Lobes</u></b>       |        |            |                |                        |         |
| R posterior Insula                | 13     | 34 -20 8   | .04            | 203                    | 3.81    |
| L Insula                          | 13     | -41 1 -6   | .06            | 163                    | 3.34    |
| <b><u>Parietal Lobes</u></b>      |        |            |                |                        |         |
| R Superior Parietal Lobule        | 7      | 21 -65 56  | .10            | 2560                   | 4.44    |
| R Postcentral Gyrus               | 2, 3   | 45 -27 53  | .08            | 853                    | 4.24    |
| L Inferior Parietal Lobule        | 40     | -38 -41 50 | .06            | 650                    | 4.11    |
| R Postcentral Gyrus               | 5      | 31 -44 60  | .05            | 366                    | 3.52    |
| R Postcentral Gyrus               | 7      | 14 -48 63  | .05            | 366                    | 3.74    |
| L Postcentral Gyrus               | 2      | -48 -31 56 | .11            | 203                    | 4.44    |
| R Postcentral Gyrus               | 1      | 48 -31 60  | .07            | 203                    | 3.66    |
| <b><u>Temporal Lobes</u></b>      |        |            |                |                        |         |
| L Transverse Temporal Gyrus       | 42     | -58 -13 12 | .08            | 1016                   | 3.82    |
| R posterior Middle Temporal Gyrus | 19, 39 | 55 -72 15  | .11            | 488                    | 5.21    |
| L Inferior Temporal Gyrus         | 37     | -48 -65 -2 | .05            | 163                    | 3.60    |

Note. BA=Brodmann Area, L=left, R=right

## Supplemental Table 6

## BOLD Responses for Regulate versus Look Harsh Faces in HC

| Brain Regions                    | BA     | x y z      | Percent Change | Vol (mm <sup>3</sup> ) | t-value |
|----------------------------------|--------|------------|----------------|------------------------|---------|
| <b><u>Regulate &gt; Look</u></b> |        |            |                |                        |         |
| <b><u>Frontal Lobes</u></b>      |        |            |                |                        |         |
| Dorsomedial PFC                  | 6      | 7 7 60     | .15            | 203                    | 4.28    |
| Dorsomedial PFC                  | 6      | -3 4 70    | .22            | 1097                   | 2.11    |
| L Middle Frontal Gyrus           | 6, 8   | -48 11 50  | .12            | 1829                   | 3.56    |
| L Middle Frontal Gyrus           | 8      | -34 -25 39 | .15            | 244                    | 4.55    |
| L Inferior Frontal Gyrus         | 45, 47 | -55 18 1   | .16            | 284                    | 3.99    |
| L Inferior Frontal Gyrus         | 44     | -52 -14 12 | .07            | 244                    | 3.14    |
| L dorsal ACC                     | 32     | -9 14 36   | .14            | 163                    | 3.32    |
| R Precentral Gyrus               | 6      | 48 -3 46   | .07            | 203                    | 3.38    |
| L Precentral Gyrus               | 4      | -52 -6 50  | .10            | 731                    | 3.74    |
| <b><u>Parietal Lobes</u></b>     |        |            |                |                        |         |
| L Supramarginal Gyrus            | 40     | -62 -55 36 | .13            | 6055                   | 3.26    |
| L Inferior Parietal Lobule       | 40     | -62 -44 43 | .14            | 284                    | 3.59    |
| <b><u>Temporal Lobes</u></b>     |        |            |                |                        |         |
| L Superior Temporal Gyrus        | 21, 22 | -58 -34 1  | .11            | 1463                   | 3.88    |
| R Superior Temporal Gyrus        | 21, 22 | 45 -31 1   | .16            | 894                    | 3.78    |
| L Superior Temporal Gyrus        | 38     | -55 21 -16 | .10            | 366                    | 3.29    |
| <b><u>Subcortical</u></b>        |        |            |                |                        |         |
| R Culmen (Cerebellum)            |        | 41 -55 -19 | .14            | 325                    | 3.39    |
| <b><u>Look &gt; Regulate</u></b> |        |            |                |                        |         |
| No Clusters                      |        |            |                |                        |         |

Note: ACC=anterior cingulate cortex, L=left, PFC=prefrontal cortex, R=right
